# Supplementary material for: Smoc1 and Smoc2 regulate bone formation as novel downstream molecules of Runx2
Source: Research Square preprint supplement (doi:10.21203/rs.3.rs-352254/v1), 2021-04-08
Supplement: Supplementary file 2 [file 611dd981c8dcb0ceb9a4aa53.docx]

**Supplementary information**

**Materials and method**

**Primer sets used for genotyping**

Smoc1 WT Forward; 5’ -TCTCTCCCATTGGCTTCCAC-3’, Reverse; 5’-GAGTGCGAGCGTGTGCTCT-3’

Smoc1 Deletion Forward; 5’-AACCGCCCCTCTCATCTCT-3’, Reverse; 5’-GGTCCAGCGACACAACTTTAT-3’

Smoc2 WT Forward; 5’-GTTCGCACACCGGATCTTC-3’, Reverse; 5’-GGTTCTCAGTGAGGGACAACAG-3’

Smoc2 Deletion Forward; 5’-TAGGTCCCTCGAAGAGGTTCA-3’, Reverse; 5’-TTGTCCCAGAAGGAAGAGTGG-3’

**ChIP-seq data analysis using Integrative Genomics Viewer (IGV)**

For the analysis of Runx2 binding region in mouse whole genome, we used public ChIP-seq data (GEO41920). Visualized the data that Runx2 binding region of the Smoc1 and Smoc2 genome were analyzed by IGV version 2.9.2 (Broad Institute and the Regents of the University of California.)

**Chromatin immunoprecipitation assay**

Chromatin immunoprecipitation (ChIP) analysis was performed by using a ChIP-IT Express Magnetic Chromatin Immunoprecipitation Kit (Active Motif, Carlsbad, CA, USA). Mouse osteoblasts were treated chromatin fixation with 1% formaldehyde for 5 min and then sonication to acquire DNA fragments of 300-1000 bp. Sonicated chromatin samples were immunoprecipitated with an anti-Runx2 antibody (Cell Signaling Technology) conjugated to protein-G magnetic beads. DNA was eluted from immunoprecipitated samples and then amplified Smoc1 promoter region and intron, Smoc2 promoter region and intron. Following primer sets were used for PCR.

Smoc1 promoter Forward; 5’-CAGGTTGTCCTCAGGGTTGT-3’, Reverse; 5’-AACCATGTCAGGCTTTCCAG-3’

Smoc1 intron Forward; 5’-TGTGCTTTGCAGAGGTTGTC-3’, Reverse; 5’-GAAATGGCTCAGCCTCTACG-3’

Smoc2 promoter Forward; 5’-GGGCAGAAACAGATGGTGAC-3’, Reverse; 5’-CAGGGGGAATAAAACCCAGT-3’

Smoc2 intron Forward; 5’-TGGCCAGCATACTGACATTT-3’, Reverse; 5’-GATGGGGTCAGTCTCAGCTC-3’

**Cells and reagents**

HEK293T cells and AAVpro 293T cell line were purchased from RIKEN Cell Bank (Ibaraki, Japan) and Takara (Shiga, Japan), respectively. Cells were cultured at 37 °C in a humidified 5% CO2 incubator with DMEM (Sigma, Saint Louis, MO, USA) containing 10 % fetal bovine serum.

**Immunoprecipitation and western blotting**

Cells were washed twice with PBS and lysed in RIPA buffer [50 mM Tyrs-HCl (pH7.4), 150 mM NaCl, 1mM EDTA, 0.25% deoxycholic acid, and 1% NP-40] containing a protease inhibitor cocktail (Nacalai Tesque, Kyoto, Japan). Lysates were centrifuged for 5 min at 4°C at 20,000 g, and supernatants were incubated with the anti-PA antibody (Wako, Japan) for 3 h at 4°C and subsequent immunoprecipitation for 3h with protein G magnetic beads (Thermo Fisher). Immunoprecipitants were washed three times with RIPA buffer and boiled in SDS sample buffer. Protein samples were separated by SDS-PAGE, followed by transfer to PVDF membranes. The membranes were incubated with anti-Flag (1:10000, 66008-3-Ig, Wako) or anti-PA (1:10000, 012-25863, Wako) antibody for 16 h at 4°C. Subsequently, membranes were incubated with anti-mouse (1:10000, 458; Medical and Biological Laboratories, Nagoya, Japan) or anti-Rat (1:10000, 7077; Cell Signalin Technology) IgGs conjugated with horseradish peroxidase for 1 h at room temperature. Finally, the membrane was incubated with an ECL detection reagent.

**Plasmids and Adeno-associated virus (AAV)**

ZsGreen coding sequence was used pZsGreen vector (Takara), and cDNA was subcloned into pcDNA3.1 expression vector. Codon optimized full-length Hoxc11 cDNA was synthesized and subcloned into pcDNA3.1 expression vector containing a 3xFlag at the N-terminal. Full-length Runx2 cDNA amplified by PCR were subcloned into pcDNA3.1 expression vector containing a PA-tag at the N-terminal. For the AAV production, Zsgreen and Hoxc11 cDNA was subcloned into pAAV-CMV vector (Takara), and generated by commercial kit using AAVpro Helper Free system (Takara).

**Alcian Blue staining**

Cells were fixed with 4% paraformaldehyde in PBS and stained with 1% Alcian Blue 8GX solution.
