# Supplementary material for: Smoc1 and Smoc2 regulate bone formation as novel downstream molecules of Runx2
Source: Research Square preprint supplement (doi:10.21203/rs.3.rs-352254/v1), 2021-04-08
Supplement: Supplementary file 3 [file 145f65666f9cf31f9c5d09f3.docx]

| Genotype | Number of pups (%) | Number of pups manifested severe deficient calvaria morphogenesis (%) |
| --- | --- | --- |
| *Smoc1*(+/+);*Smoc2*(+/+) | 5 (5.15 %) | 0 (0 %) |
| *Smoc1*(+/-);*Smoc2*(+/+) | 17 (17.52 %) | 0 (0 %) |
| *Smoc1*(-/-);*Smoc2*(+/+) | 5 (5.15 %) | 0 (0 %) |
| *Smoc1*(+/+);*Smoc2*(+/-) | 6 (6.18 %) | 0 (0 %) |
| *Smoc1*(+/-);*Smoc2*(+/-) | 21 (21.64 %) | 0 (0 %) |
| *Smoc1*(-/-);*Smoc2*(+/-) | 10 (10.30 %) | 4 (40 %) |
| *Smoc1*(+/+);*Smoc2*(-/-) | 11 (11.34 %) | 0 (0 %) |
| *Smoc1*(+/+);*Smoc2*(-/-) | 16 (16.49 %) | 0 (0 %) |
| *Smoc1*(+/+);*Smoc2*(-/-) | 6 (6.18 %) | 6 (100 %) |

**Supplementary Table S3**

*Smoc1*(+/-);*Smoc2*(+/-) x *Smoc1*(+/-);*Smoc2*(+/-)

E18.5 stage
